# Supplementary material for: Enterovirus D68 VP3 Targets the Interferon Regulatory Factor 7 To Inhibit Type I Interferon Response
Source: PubMed Central journal article supplement (PMC10269600; doi:10.1128/spectrum.04138-22), 2023-05-01
Supplement: spectrum.04138-22-s0001.pdf [file spectrum.04138-22-s0001.pdf]

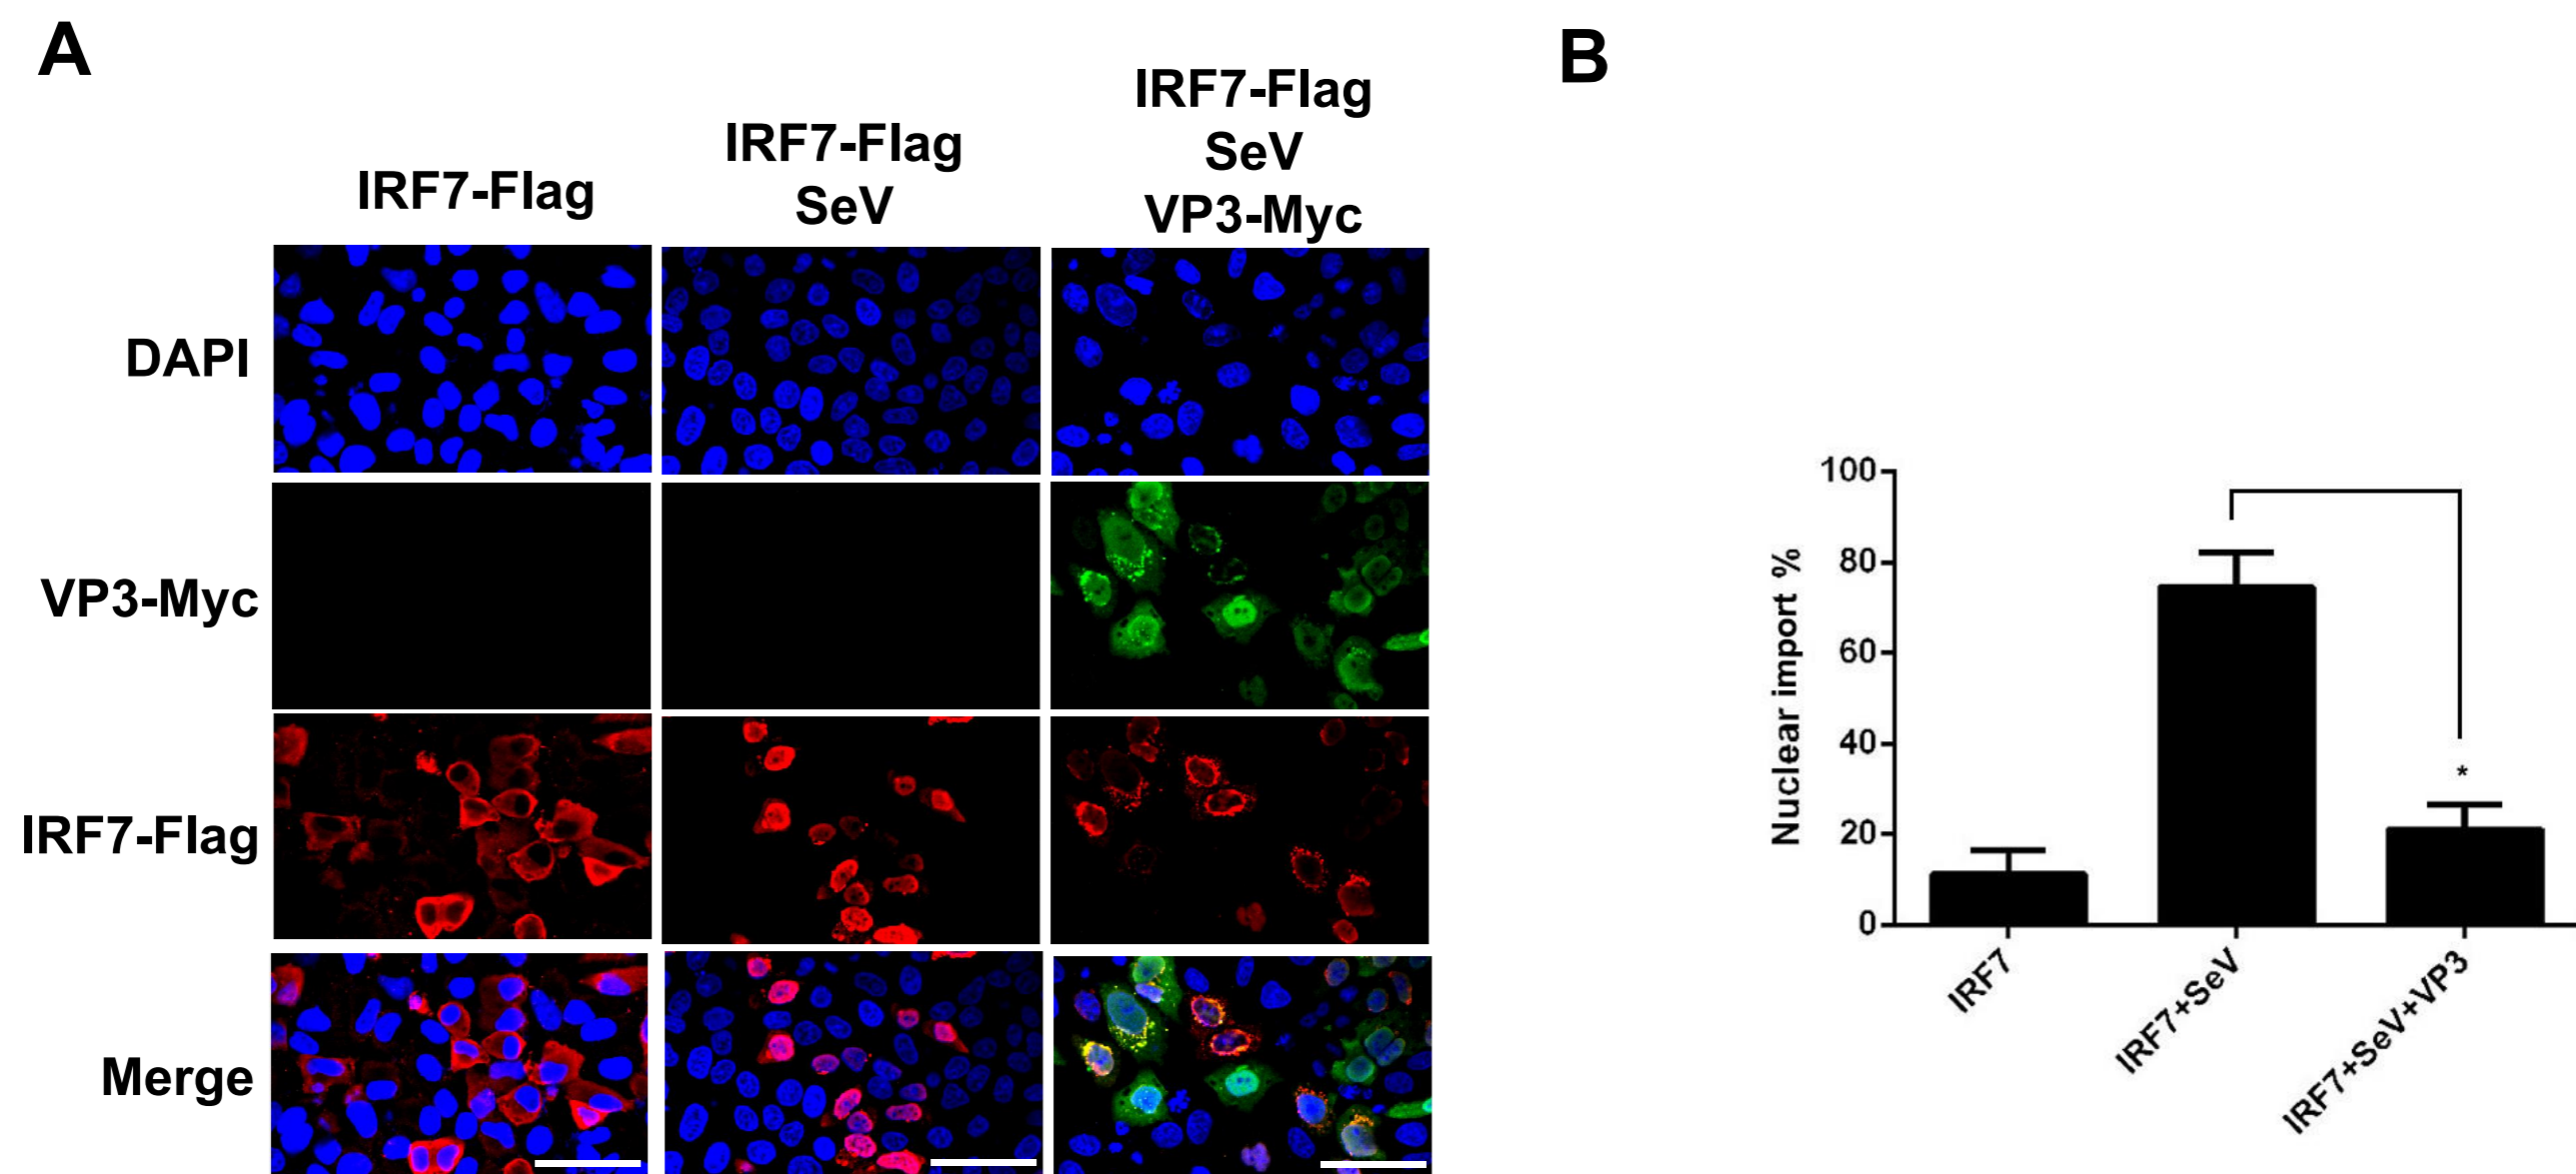

**Fig S1**

**Fig S1** (A) EV-D68 VP3 inhibits the nuclear translocation of IRF7 after SeV stimulation in HeLa cells. HeLa cells were seeded on glass coverslips overnight and transfected with 300 ng IRF7-Flag or 500 ng VP3-Myc or both plasmids, 24 h after transfection, cells were infected with SeV (20 HA/mL) for 16 h. Then, the cells were analyzed using immunofluorescence staining with anti-Myc (green), anti-Flag (red), and DAPI (blue) and microscopy. (B) EV-D68 VP3 inhibits the nuclear translocation of IRF7 after SeV stimulation in HeLa cells. Co-localization of exogenous VP3 and IRF7 or IRF3 in HEK293T cells. HeLa cells were seeded on glass coverslips overnight and transfected with 300 ng IRF7/IRF3-Flag or 500 ng VP3-HA or both plasmids, 24 h after transfection, cells were infected with SeV for 16 h. Then, the cells were analyzed using immunofluorescence staining with anti-VP3 (green), anti-IRF7 (red), and DAPI (blue) and microscopy. Two hundred cells were counted for calculating nuclear translocation for each group.

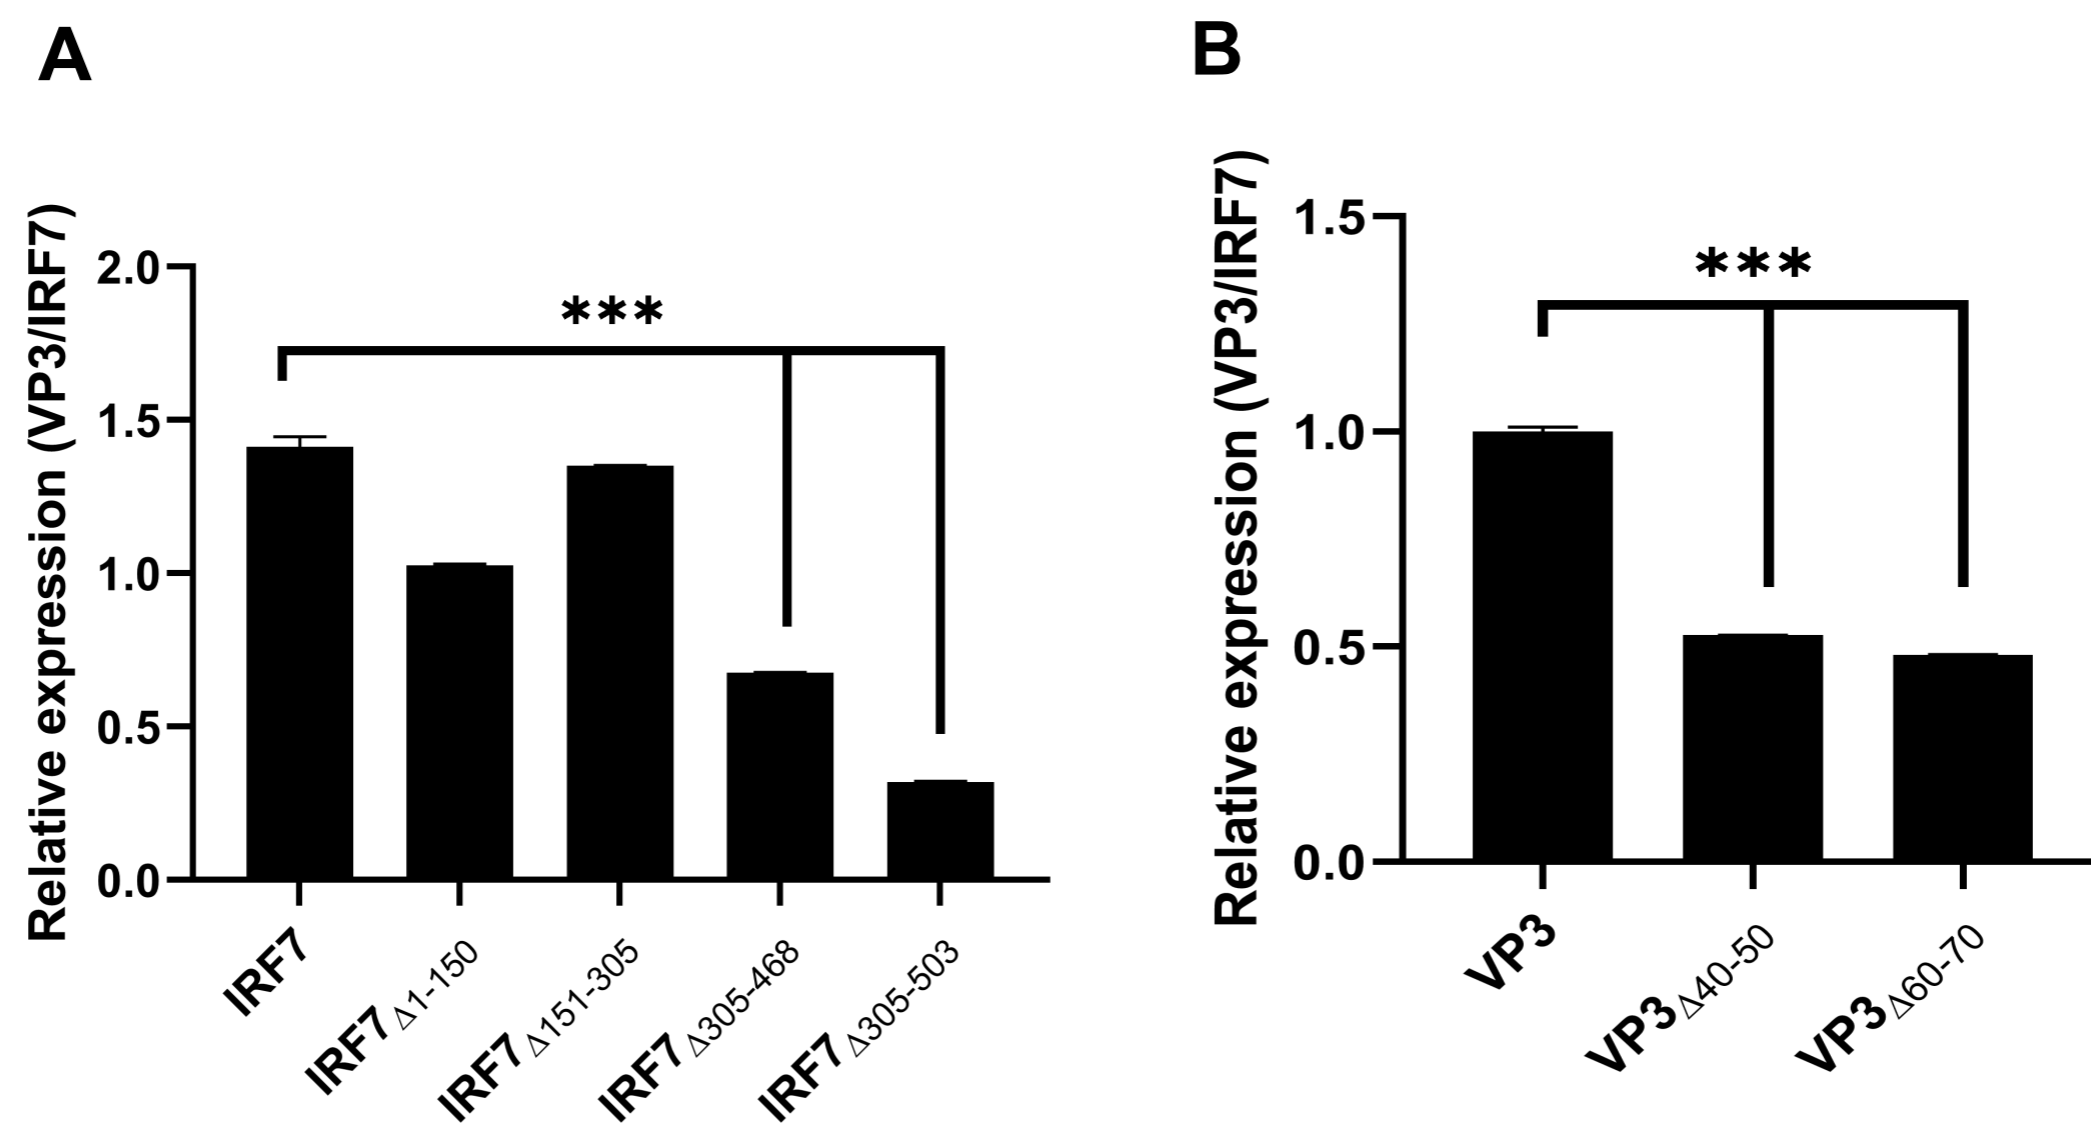

**Fig S2**

**Fig S2.** (A) Quantification of the relative expression of VP3/IRF7 in (Fig 5C). (B) Quantification of the relative expression of VP3/IRF7 in (Fig 5G).

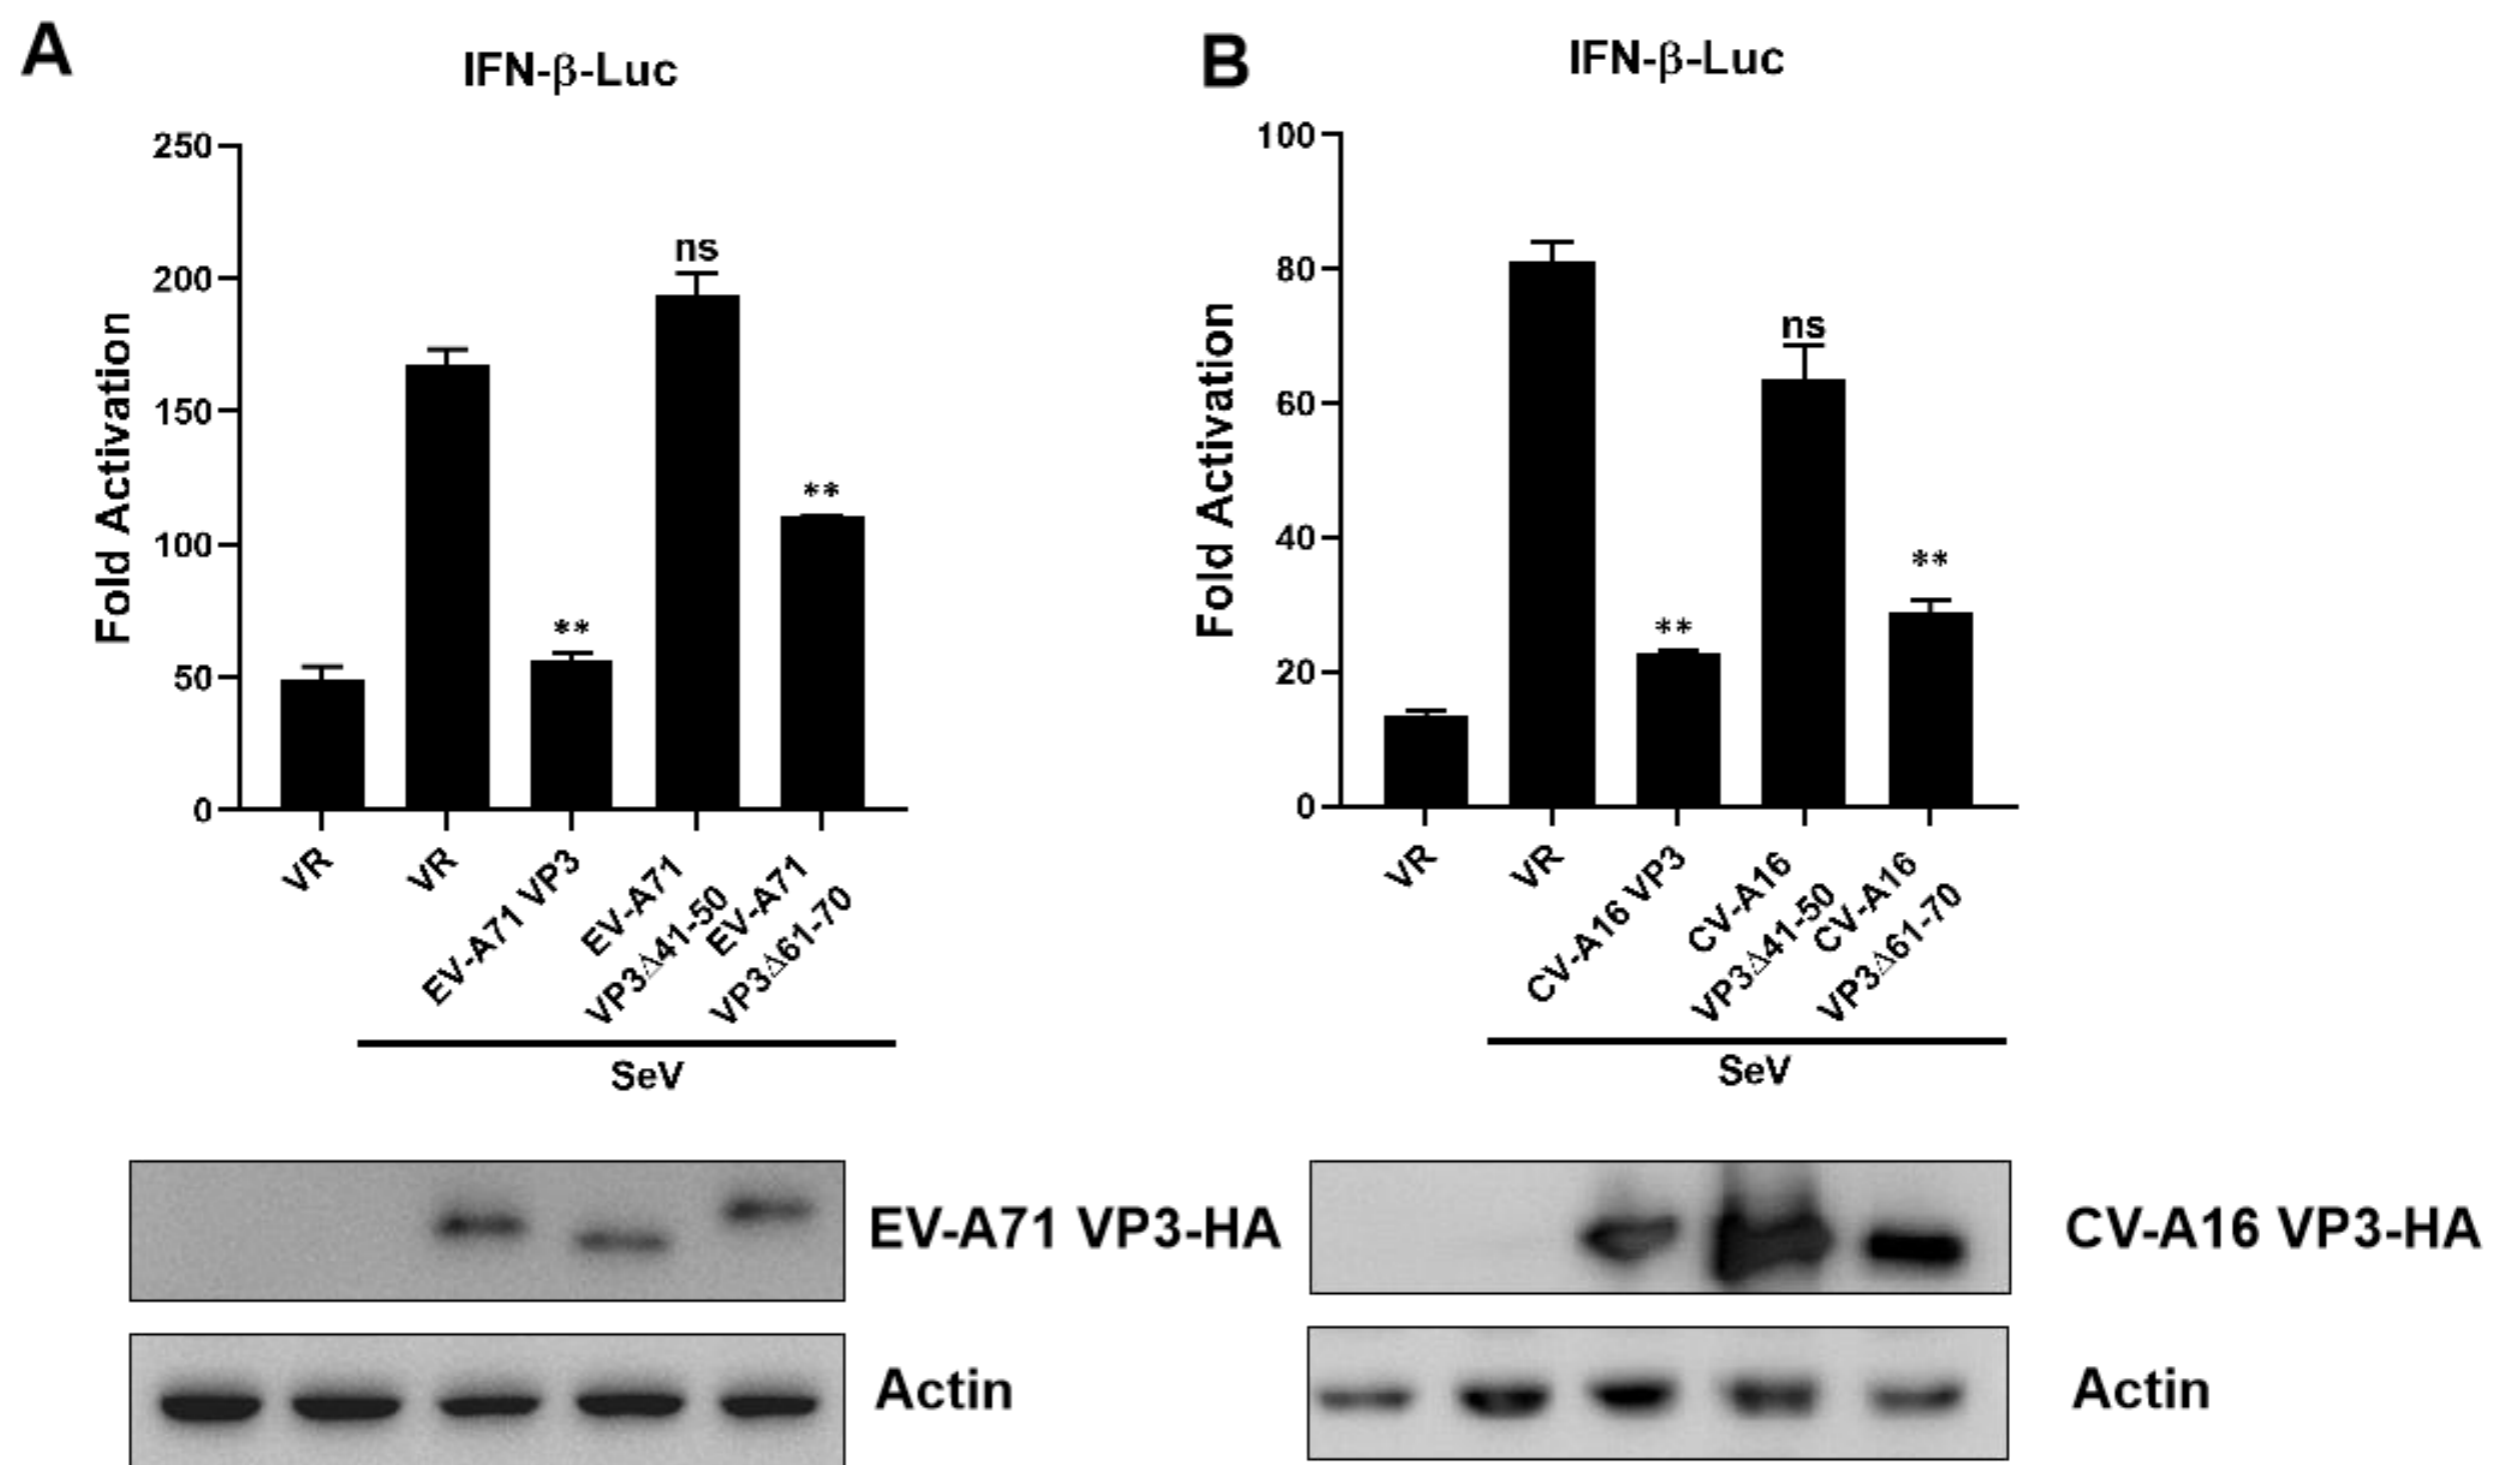

**Fig S3**

**Fig S3.** (A) HEK293T cells were transfected with 600ng EV-A71 VP3, EV-A71 VP3 $\Delta$ 41-50, EV-A71 VP3 $\Delta$ 61-70 and 200 ng of IFN- $\beta$ -Luc; 2 ng of pRL-SV40 was used as an internal control. Twenty-four hours after transfection, the cell lysates were subjected to a luciferase assay. (B) HEK293T cells were transfected with 600ng CV-A16 VP3, CV-A16 VP3 $\Delta$ 41-50, CV-A16 VP3 $\Delta$ 61-70 and 200 ng of IFN- $\beta$ -Luc; 2 ng of pRL-SV40 was used as an internal control. Twenty-four hours after transfection, the cell lysates were subjected to a luciferase assay.

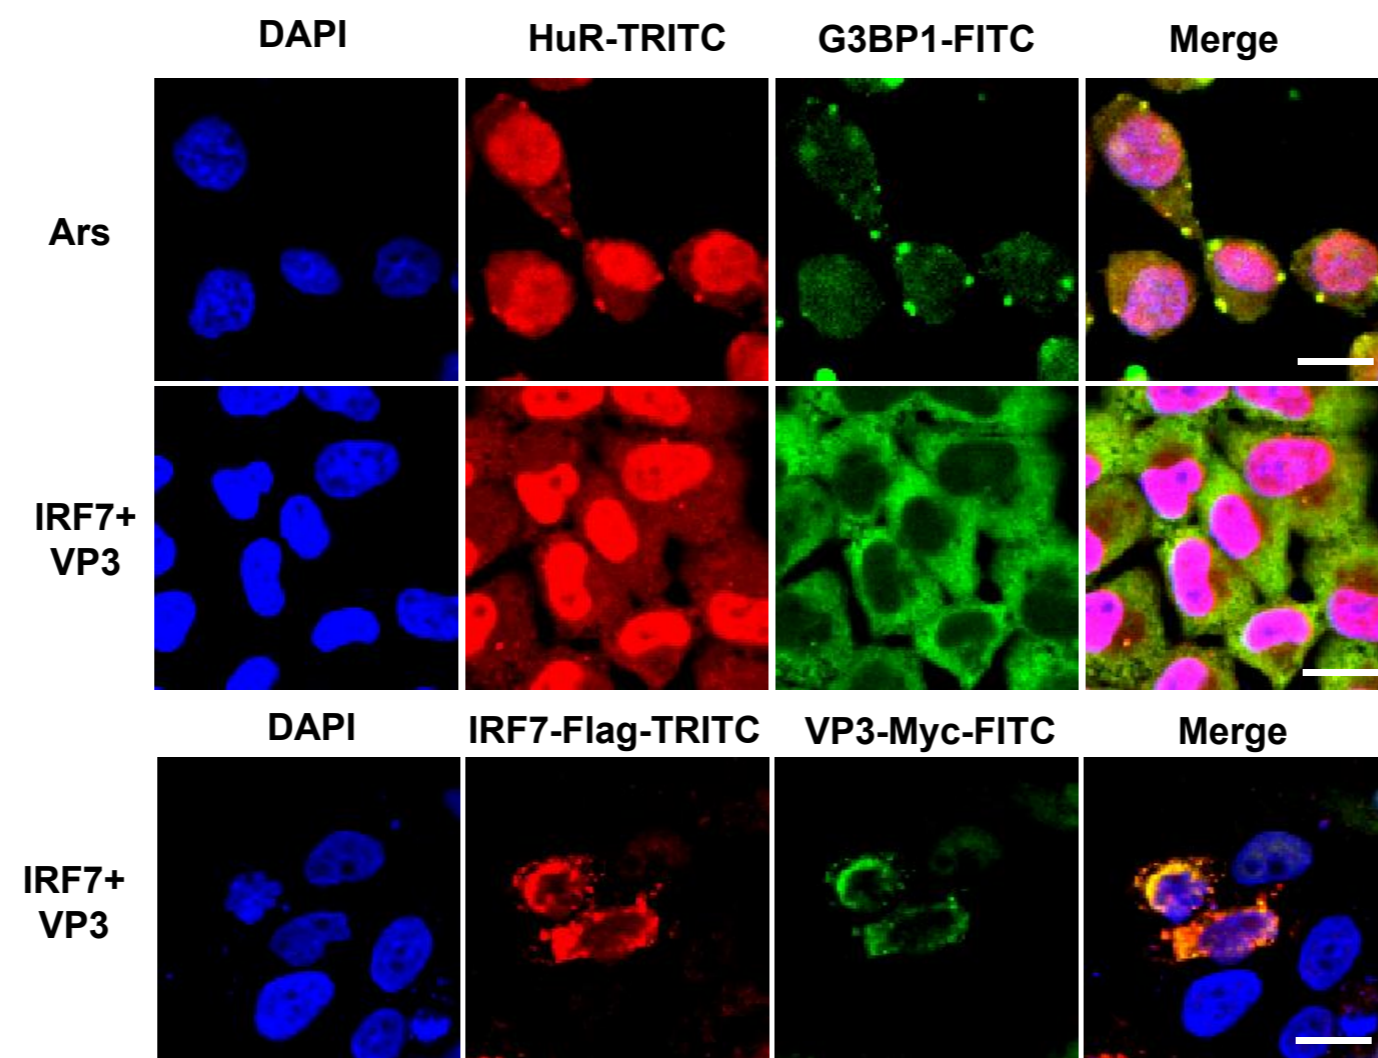

**Fig S4**

**Fig S4.** After VP3 and IRF7 were expressed together, SGs could not be produced.
